# Supplementary material
Source: HighWire-hosted journal article supplement (https://www.annfammed.org/highwire/filestream/16272/field_highwire_adjunct_files/0/Usher-Pines-Supp-App.pdf)
Supplement: Usher-Pines-Supp-App.pdf [file Usher-Pines-Supp-App.pdf]

## Supplemental materials for

Bhardwaj A, Sousa JL, Huskamp HA, et al. Prescribing medications for alcohol use disorder: a qualitative study of primary care physician decision making. *Ann Fam Med.* 2023;21(4):332-337.

## Supplemental Appendix

### Screener

1. Please indicate your training:
  - A. Internal medicine physician/Internist (CONTINUE)
  - B. Family medicine physician (CONTINUE)
  - C. Geriatrician (TERMINATE)
  - D. Psychiatrist (TERMINATE)
  - E. Nurse Practitioner or Certified Nurse Specialist (TERMINATE)
  - F. Physician Assistant (TERMINATE)
  - G. Obstetrician/Gynecologist (TERMINATE)
  - H. Pediatrician (TERMINATE)
  - I. Other (TERMINATE)
  
2. About how many hours per week do you currently spend providing direct clinical care in an outpatient setting?
  - a. Hours in outpatient setting \_\_\_\_\_

(IF LESS THAN 10 HOURS TERMINATE, OTHERWISE CONTINUE)
  
3. What best describes your primary practice setting (i.e., setting where you work the most hours)?
  - a) Solo private practice
  - b) Non-hospital-based group private practice
  - c) Hospital-based outpatient clinic
  - d) Community health center (e.g., FQHC, rural health center, community mental health center)
  - e) Other outpatient setting
  - f) Residential treatment facility (TERMINATE)
  - g) Inpatient setting within a hospital (TERMINATE)
  - h) Emergency department (TERMINATE)
  - i) Other (TERMINATE)
  
4. What best describes the population of patients you treat?
  - a) All or most of my patients are under age 18 (TERMINATE)
  - b) I treat both adults and children under age 18

- c) I only treat adults  
(TERMINATE A; ONLY ALLOW B OR C)

5. Do you work for any of the following in your main practice setting?
- |                           |     |    |
|---------------------------|-----|----|
| a. Veterans Affairs (VA)  | Yes | No |
| b. Indian Health Service  | Yes | No |
| c. Military Health System | Yes | No |

(MUST SELECT "NO" TO a-c TO CONTINUE, IF "YES" TO ANY in a-c TERMINATE)

6. In which state is your main practice setting located? (SELECT ONE)
7. In the last six months, did you initiate a patient on disulfiram (Antabuse), naltrexone (ReVia, Vivitrol), and/or acamprosate (Campral) for the treatment of alcohol use disorder?
- A. No (TERMINATE after completing question 8)
- B. Yes, I initiated prescribing of one or more of these medications to treat patient(s) with alcohol use disorder in the past six months (Continue)
